# Supplementary material
Source: ML conference proceedings conference paper supplement (https://openreview.net/forum?id=hpYb4eUinX)
Supplement: supplementary_material [file attachment]

---

# Boosting Verification of Deep Reinforcement Learning via Piece-wise Linear Decision Neural Networks

---

Anonymous Author(s)

Affiliation

Address

email

## Abstract

1       Formally verifying deep reinforcement learning (DRL) systems suffers from both  
2       inaccurate verification results and limited scalability. The major obstacle lies in the  
3       large overestimation introduced inherently during training and then transforming  
4       the inexplicable decision-making models i.e., deep neural networks (DNNs), into  
5       easy-to-verify models. In this paper, we propose an inverse *transform-then-train*  
6       approach, which first encodes a DNN into an equivalent set of efficiently and  
7       tightly verifiable linear control policies and then optimizes them via reinforcement  
8       learning. We accompany our inverse approach with a novel neural network model  
9       called *piece-wise linear decision neural networks* (PLDNNs), which are compatible  
10      with most existing DRL training algorithms with comparable performance against  
11      conventional DNNs. Our extensive experiments show that, compared to DNN-  
12      based DRL systems, PLDNN-based systems can be more efficiently and tightly  
13      verified with up to 438 times speedup and a significant reduction in overestimation.  
14      In particular, even a complex 12-dimensional DRL system is efficiently verified  
15      with up to 7 times deeper computation steps.

## 16   1 Introduction

17   Deep neural networks (DNNs) have been exhibiting appealing advantages in decision-making and  
18   control for deep reinforcement learning (DRL) systems [1–4]. Nonetheless, the complexity and  
19   inexplicability [5, 6] of DNNs render the formal verification of their hosting systems, quite often  
20   even themselves, inaccurate and unscalable. Most existing approaches [7–10] over-approximate both  
21   embedded DNNs and non-linear environment dynamics to build verifiable models, which inevitably  
22   introduces *dual* overestimation. In particular, DNN-specific overestimation is extremely unpredictable  
23   due to many factors such as the dimension of system states, the complexity of environment dynamics,  
24   and the size, weight, and activation function of a neural network. For example, the verification results  
25   may deviate significantly even if the DNNs of the same DRL system differ only in their weights (as  
26   we also observed; see Appendix A.4 ). Unsurprisingly, verifying high-dimensional DRL systems  
27   would only exacerbate the problems of large overestimation and limited scalability.

28   Common practice for formally verifying DRL systems is to *train and then transform* the embedded  
29   DNNs into easy-to-verify models where, for any input set, output ranges can enclose the outputs of  
30   the over-approximated DNNs [7–10]. Taylor models [11] are widely adopted due to their preservation  
31   of input-output dependencies and less overestimation (accumulated in multiple steps) than the range  
32   analysis approaches such as interval over-approximation [12, 13]. However, they are still prone to  
33   intractable overestimation as the accuracy of verification depends heavily on the weights of DNNs  
34   whose effects are difficult to quantify. Several other approaches attempt to extract approximated  
35   state-action policies, e.g., decision trees [14, 15], from DNNs via model compression [16] and  
36   distillation [17] techniques. However, no equivalence guarantee is established between DNNs and  
37   the extracted policies. Consequently, verification results are just probably approximately correct [18].

Inspired by recent advances [19–21] in training near-optimal policies even with reduced training state space imposed by aggregated adjacent states, we propose a novel, inverse *transform-then-train* approach: encoding a DNN into an equivalent set of easy-to-verify linear control policies and *then* optimizing them by training the DNN using reinforcement learning. We accompany our inverse approach by devising a novel neural network model called *piece-wise linear decision neural networks* (PLDNNs), which make linear decisions on each abstract state. Unlike conventional DNNs which build a state-action relation for each actual state, a PLDNN defines a linear relationship, called *Linear Control Unit* (LCU), between actions and actual states associated with the same abstract state. To this end, a PLDNN is essentially a set of LCUs for all abstract states. In contrast to DNNs, LCUs are more explainable and verifiable without any over-approximation. Moreover, PLDNNs are *compatible* with most existing DRL training algorithms as both share the same input and output layers for the same control task.

We extensively assess PLDNN, along with the state-of-the-art tools, with respect to both *performance* (in terms of cumulative rewards and system robustness) and *verifiability* (in terms of overestimation and time cost for the reachability analysis of trained systems) on a collection of benchmarks, including a 12-dimensional control task. Our experimental results show that, compared to the DNN-based systems, the PLDNN-based systems can be verified more precisely, with significantly less overestimation, and more efficiently, with up to 438 times speedup, while achieving comparable performance. Moreover, compared to the state-of-the-art tools, the complex 12-dimensional control task can be trained and verified with up to 7 times deeper computation steps, along with notable tightness improvement.

**Main Contributions.** Overall, we provide

1. a novel *inverse* approach for boosting the formal verification of DRL systems by learning efficiently and directly (without over-approximation) verifiable piece-wise linear policies with comparable performance;
2. a novel neural network model to realize the learned piece-wise linear policies, which is compatible with most existing DRL algorithms; and
3. a prototype called LINCON, along with an extensive assessment which demonstrates its tightness in verification results, outperformance over the state-of-the-art tools (up to 438 times speedup), and scalability (up to a 12-dimensional control task).

## 2 Problem Formulation and Motivation

A DRL system is driven by a DNN-implemented controller  $\pi$ , which is trained for decision-making, and a physical model defined by the ordinary differential equations (ODEs)  $\dot{s} = f(s, a)$ , with  $s$  the state variables and  $a$  a control action. We have  $a = \pi(s)$  at state  $s$  and assume  $\dot{a} = 0$  during a small time step e.g.,  $\delta$ . At the time point  $k\delta$ ,  $k \in \mathbb{N}$ , the decision network receives the current state  $s_k$  and outputs an action  $a^{(k)} = \pi(s_k)$ . The state variables then evolve according to the physical model during the time interval  $[0, \delta]$ . The reachable state  $s_{k+1}$  at  $\delta$  from  $s_k$  is

$$s_{k+1} = s_k + \int_0^\delta f(s, a^{(k)}) dt \quad (1)$$

which is called the successor state of  $s_k$ . Note that the system evolves continuously from  $s_k$  to  $s_{k+1}$ . The intermediate states can be computed by substituting the time elapses for  $\delta$  in the above formula.

A DRL system is essentially a DNN-controlled hybrid system. Definition 1 gives a formal definition of regular hybrid systems. The state space of a hybrid system is the Cartesian product of a set  $L$  of discrete locations and state space of  $n$  real-valued variables  $V_c$ . At each location  $l \in L$ , the  $n$

**Definition 1** (Hybrid Automata [9]). *A hybrid automaton is an 8-tuple  $H = \langle L, Var, Inv, F, T, G, R, I_0 \rangle$  where*

- $L$  is a finite set of discrete locations;
- $Var$  is a finite set of  $n$  real-valued variables with state space  $V_c \subseteq \mathbb{R}^n$ ;
- $Inv : L \rightarrow 2^{V_c}$  is a function assigning to each location an invariant condition;
- $F : L \rightarrow (V_c \rightarrow \mathbb{R}^n)$  is a function associating each location  $l$  to a continuous dynamics  $\dot{v} = f_l(v)$ ;
- $T \subseteq L \times L$  is a set of transitions between locations;
- $G : T \rightarrow 2^{V_c}$  is a function assigning each transition  $(l_1, l_2) \in T$  a guard condition  $G(l_1, l_2) \subseteq Inv(l_1)$ ;
- $R : T \rightarrow 2^{V_c}$  is a function assigning each transition  $(l_1, l_2) \in T$  a reset  $R(l_1, l_2) \subseteq Inv(l_2)$ ; and
- $I_0 \subseteq L \times V_c$  is an initial state set.

continuous variables evolve continuously according to a dynamical law  $\dot{v} = f_i(v)$ . When the guard condition on the transition between locations  $(l_1, l_2) \in T$  is triggered, the system moves to  $l_2$ , and the continuous variables are reset by  $R$ . There are two steps involved in the state transition from  $(l_i, v_i)$  to its *successor state*  $(l_{i+1}, v_{i+1})$ : first, from  $(l_i, v_i)$  to its *time successor*  $(l_i, \varphi_{f_i}(v_i, t_i))$ , and then, to  $(l_{i+1}, v_{i+1})$  that is the *transition successor* of  $(l_i, \varphi_{f_i}(v_i, t_i))$ , where  $\varphi_{f_i}$  is the solution of  $f_i$  with initial condition  $v(0) = v_i$ , mapping the initial state  $v_i$  to the state  $\varphi_{f_i}(v_i, t)$  (i.e., the reachable state at time  $t$  from  $v_i$ ). Accordingly, the state of a hybrid system can be changed in two ways [22]: (i) by a time delay that changes only the value of continuous variables according to the dynamics of the current location defined in  $F$ ; and (ii) by a discrete and instantaneous transition that changes both location and continuous variables according to the rules in  $T$ .

**Theorem 1** (Modeling DRL Systems as Hybrid Automata). *A DRL system with an environment dynamics  $f$ , decision network  $\pi$ , time step size  $\delta$ , and initial state set  $S_0$ , can be modeled as the following hybrid automaton:*

- *Var*: state variable  $s$ , action  $a$ , and clock variable  $t_c$  •  $I_0: \{(l_0, (s \in S_0, a = 0, t_c = \delta))\}$
- $L: \{l_0\}$  •  $Inv: Inv(l_0) = \{s \in S, t_c \leq \delta\}$  •  $F: F(l_0) = \{\dot{s} = f(s, a), \dot{a} = 0, \dot{t}_c = 1\}$
- $T: \{(l_0, l_0)\}$  •  $G: G(l_0, l_0) = \{t_c = \delta\}$  •  $R: R(l_0, l_0) = \{t_c = 0, a = \pi(s)\}$

Figure 1 depicts the hybrid automaton defined in Theorem 1. There exists only one location  $l_0$ . The invariants in  $Inv$  claim that any state belongs to the state space  $S$  and the clock variable  $t_c$  is less than or equal to the time step size  $\delta$ . The flow in  $F$  defines the dynamics of the system. The only transition is triggered when  $t_c = \delta$ , updating the action  $a$  and resetting  $t_c$  as defined in  $R$ . The continuous change happens during the time interval  $[i\delta, (i+1)\delta]$ , with  $i \in \mathbb{N}$ , and the discrete change of actions occurs at each  $\delta$ .

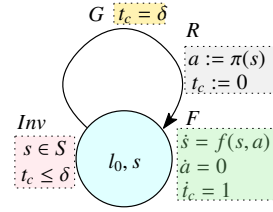

Figure 1: Hybrid automaton for a DRL system.

Unfortunately, the hybrid automaton of a DRL system cannot be verified by using existing hybrid automata model checkers such as Flow\* [23], Ariadne [24], and CORA [25]. The reason is that the action  $a$  in  $R$  depends on the uninterpretable DNN  $\pi$  by  $a := \pi(s)$ , and  $\dot{s} = f(s, a)$  can not be expressed in a known closed-form which is required by regular hybrid automata supported by these tools [26]. Hence, almost all reachability-based verification methods for DRL systems such as Polar [10], Sherlock [7], and ReachNN [27] inevitably over-approximate  $\pi$  using a Taylor model, at the cost of large overestimation and time overhead.

### 3 Piece-Wise Linear Control Policies

To bypass the crux of over-approximating DNNs, we devise a novel, alternative neural network model which essentially realizes a set of linear control policies. Our approach bases on the common assumption that there exists a near-optimal linear control policy for every small region of the entire state space [28, 29, 21, 30]. Our objective is then to discretize the state space  $S$  of a DRL system and to train a linear control policy for each discretized region. Specifically, given an  $n$ -dimensional DRL system with  $m$ -dimensional control input, we train a DNN which implements a linear control function  $a_j = b^j + c_1^j x_1 + c_2^j x_2 + \dots + c_n^j x_n$  for each control dimension  $1 \leq j \leq m$  and each discretized region.

#### 3.1 Abstracting State Space via Abstract Interpretation

Abstract Interpretation [31] is an effective technique for scaling up formal verification of complex systems or programs by reducing the system space while preserving the soundness of verification results. For instance, an infinite state space  $[-2, 0] \times [0, 2]$  can be abstracted to be an abstract state represented as  $(-2, 0, 0, 2)$ , when all the states in  $[-2, 0] \times [0, 2]$  share a same property. In general, given a system state space  $S$ , we denote  $S_\phi$  as a finite set of abstract states (each abstract state represents a possibly infinite set of actual system states in  $S$ ). Let  $\phi : S \rightarrow S_\phi$  be an abstraction function that maps each actual state  $s$  in  $S$  to the corresponding abstract state in  $S_\phi$ , and  $\phi^{-1} : S_\phi \rightarrow 2^S$  be the inverse concretization function such that  $\phi^{-1}(s_\phi) = \{s | s \in S, \phi(s) = s_\phi\}$ .

For state space abstraction, we choose the very primitive but effective abstraction approach which abstracts actual system states as intervals. It is known as *interval abstract domain* and has been

well studied for system [32] and program verification [33] and even the approximation of neural networks [34]. Specifically, let  $L_i$  and  $U_i$  be the lower and upper bounds for the  $i$ -th dimension value of  $S$ . We first define the abstraction granularity as an  $n$ -dimensional vector  $\gamma = (d_1, d_2, \dots, d_n)$ . Then the  $i$ -th dimension will be divided evenly into  $(U_i - L_i)/d_i$  intervals which means each abstract state can be represented as a  $2n$ -dimensional vector  $(l_1, u_1, \dots, l_n, u_n)$ .

**Definition 2** (Interval-Based Abstraction Function). *Given an  $n$ -dimensional continuous state space  $S$  and an abstract state space  $S_\phi$  which discretizes  $S$  based on abstraction granularity  $\gamma$ ,  $\phi : S \rightarrow S_\phi$  is called an interval-based abstraction function such that, for every actual state  $s = (x_1, \dots, x_n) \in S$  and abstract state  $s_\phi = (l_1, u_1, \dots, l_n, u_n) \in S_\phi$ , we have  $\phi(s) = s_\phi$  if and only if  $l_i \leq x_i < u_i$  holds for each dimension  $1 \leq i \leq n$ .*

**Example 1** (Running Example). *Consider a 2-dimensional system in [35] with state space  $[-2, 2) \times [-2, 2)$ . The dynamics  $f$  is defined by following ordinary differential equations (ODE) i.e.,  $\dot{x}_1 = x_2 - x_1^3$  and  $\dot{x}_2 = a$ . The sign  $a$  means the control action. The objective is to train a DNN for determining action  $a$  based on  $(x_1, x_2)$  so that the agent can move from the initial region  $x_1 \in [0.7, 0.9]$  and  $x_2 \in [0.7, 0.9]$  to the goal region  $x_1 \in [-0.3, 0.1]$  and  $x_2 \in [-0.35, 0.05]$  as soon as possible.*

Suppose that the abstraction granularity is  $\gamma = (2, 2)$ . The continuous state space  $[-2, 2) \times [-2, 2)$  is then partitioned into four regions, corresponding to four abstract states represented by  $S_\phi = \{(-2, 0, -2, 0), (-2, 0, 0, 2), (0, 2, -2, 0), (0, 2, 0, 2)\}$ , respectively.

### 3.2 Piece-Wise Linear Decision Neural Networks

We devise an alternative DNN model called *piece-wise linear decision neural networks* (PLDNNs). Unlike conventional DNNs, a PLDNN contains an *abstraction layer* between the input layer and the first hidden layer. The abstraction layer is used to convert an actual system state into its corresponding abstract state. Then the output of a PLDNN is the control action that is the *dot product* result of state variables of the actual state and the linear coefficients determined by the corresponding abstract state.

Figure 2 exemplifies the architecture of the PLDNN  $\pi$  for a two-dimensional DRL system. The decision-making of  $\pi$  is based on a coefficient network  $\pi_c$  that outputs the linear coefficients. The second layer of  $\pi_c$  is the inserted abstraction layer which consists of the blue neurons and the red neurons. The output layer of  $\pi_c$  contains  $n + 1$  neurons that output the  $n + 1$  linear coefficients depicted as purple neurons. As for the weights setting between the input layer and the abstraction layer, the weights of the connections between the  $i$ -th neuron in the input layer and the  $(2i - 1)$ -th and  $2i$ -th neurons in the abstraction layer are set to 1 which are represented by blue lines and red lines, respectively. While the weights of other connections denoted by the black dashed lines are set to 0. Under this setting of weights, the inputs to both  $(2i - 1)$ -th and  $2i$ -th neurons in the abstraction layer are  $x_i$ . Moreover, the activation function of the  $(2i - 1)$ -th neuron in the abstraction layer is set to  $\phi_u$  with the responsibility of computing the upper bound  $u_i$ , and that of the  $2i$ -th neuron is set to  $\phi_l$  for calculating the lower bound  $l_i$ . Specifically, for a continuous state space partitioned by the abstraction granularity  $\gamma = (d_1, \dots, d_n)$ , the activation functions for the  $(2i - 1)$ -th and  $2i$ -th neurons in the abstraction layer can be formulated as follows:

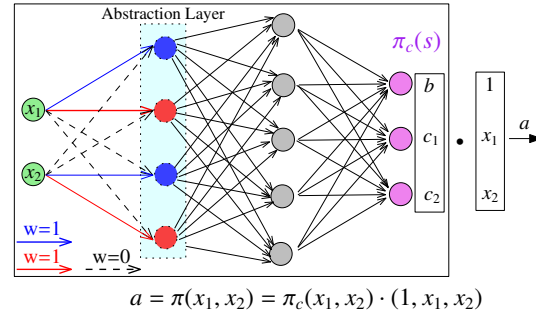

Figure 2: The arch. of the PLDNN for Example 1.

$$\phi_l^i(x_i) = L_i + \lfloor \frac{(x_i - L_i)}{d_i} \rfloor d_i \quad \phi_u^i(x_i) = L_i + \lfloor \frac{(x_i - L_i)}{d_i} \rfloor d_i + d_i$$

With the above activation functions, the abstraction layer can output the same abstract state  $s_\phi = (l_1, u_1, \dots, l_n, u_n)$  for  $\forall s \in \phi^{-1}(s_\phi)$ . The abstract state  $s_\phi$  is then propagated to the fully connected layers of  $\pi_c$  to generate the linear control coefficients  $(b, c_1, c_2)$  denoted by  $\pi_c(s)$ .

To obtain the final output of action  $a$ , an additional dot product operation between  $\pi_c(s)$  and  $[1, s]$  is performed with the result of the operation as the control action  $a$  where  $[\cdot, \cdot]$  is the concatenation operation. For multiple dimensional control action  $a = (a_1, \dots, a_m)$ , we only need to modify the

---

**Algorithm 1:** The Training Procedure based on the DDPG algorithm

---

**1 Input:** State space  $S$ , abstraction granularity  $\gamma$ .      **Output:** A PLDNN  $\pi$   
**2**  $\phi \leftarrow$  discretize  $S$  according to  $\gamma$ ;      // obtain abstraction function, Sec3.1  
**3** Initialize actor network  $\pi$  as a PLDNN by encoding  $\phi$  into the coefficient network  $\pi_c$ ; // Sec3.2  
**4** Initialize critic network  $Q$ , target networks  $\pi' \leftarrow \pi, Q' \leftarrow Q$ ;  
**5** DDPG( $\pi, Q, \pi', Q'$ );      // train  $\pi$  based on DDPG algorithm  
**6 return**  $\pi$

---

190 output dimension of  $\pi_c$  to  $m(n+1)$ , such that each  $n+1$  neurons output the linear coefficients of one  
 191 dimension of  $a$ . More specifically, we can obtain  $a_j$  as follows:

$$a_j = \pi(s)_j = \pi_c(s)[(n+1)(j-1) : (n+1)j] \cdot [1, s], 1 \leq j \leq m.$$

192 where  $\text{vector}[\text{start} : \text{end}]$  denotes the slicing operation that extracts the elements of  $\text{vector}$  from  
 193 index  $\text{start}$  up to but not including index  $\text{end}$ .

194 With the additional abstraction layer that can output an identical vector into the fully connected layers  
 195 of  $\pi_c$  for  $\forall s \in \phi^{-1}(s_\phi)$ , we can ensure that  $\pi_c$  always produces the same coefficients for all actual  
 196 states located in the same abstract state. Consequently, we can extract a piecewise linear decision  
 197 function with this structure of  $\pi$  on each abstract state.

### 198 3.3 The Training Procedure

199 Training a PLDNN can be achieved by extending exist-  
 200 ing deterministic policy gradient algorithms such as Deep  
 201 Deterministic Policy Gradient (DDPG) [36] and Twin De-  
 202 layed Deep Deterministic Policy Gradient [37] since the  
 203 modifications made stay inside neural networks and are  
 204 invisible to the DRL algorithms. The pseudo code of  
 205 the training procedure is given in Algorithm 1, where we  
 206 take the DDPG algorithm as an example. The training  
 207 procedure starts with defining the abstraction function  $\phi$   
 208 according to  $\gamma$  (Line 2), initializing PLDNN with an ab-  
 209 straction layer based on  $\phi$  (Line 3), and, following [36],  
 210 initializing the critic network and the two target networks  
 211 (Line 4). The procedure then invokes the DDPG algorithm with the networks as arguments (Line  
 212 5) since the PLDNN has the same input and output as the actor network implemented by DNN.  
 213 During this procedure, we freeze the parameters between the input and the abstraction layers of  $\pi$ .  
 214 The parameters in the fully connected layers are trained based on backpropagation [38] and gradient  
 215 descent optimization [39].

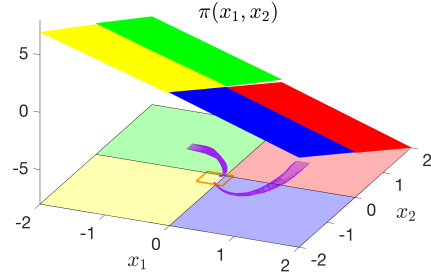

Figure 3: The LCUs extracted from a trained PLDNN for Example 1.

## 216 4 Equivalent Policy Extraction and Verification

217 After training, we can extract  $|S_\phi|$  LCUs based on the learned coefficients of linear control policies  
 218 for the abstract states in  $S_\phi$ . Specifically, we choose an actual state for each abstract state and feed it  
 219 to a PLDNN to obtain the coefficients for the abstract state. For instance, we can feed  $(-1, -1)$  to  
 220 the PLDNN in Example 1 and obtain the coefficients  $(-0.16610657, -1.7437580, -1.8227874)$  of  
 221 the linear control policy for the region  $[-2, 0) \times [-2, 0)$ . Figure 3 shows the LCUs extracted from a  
 222 trained PLDNN in Example 1. They are depicted by planes with different colors in Figure 3. These  
 223 four planes denote the following linear control functions:

$$\begin{aligned}
 \pi(x_1, x_2) &= -0.16610657 - 1.7437580x_1 - 1.8227874x_2, & x_1 \in [-2, 0), & x_2 \in [-2, 0) & (\text{LCU}_1) \\
 \pi(x_1, x_2) &= -0.20400035 - 1.8006037x_1 - 1.8679885x_2, & x_1 \in [-2, 0), & x_2 \in [0, 2) & (\text{LCU}_2) \\
 \pi(x_1, x_2) &= -0.27547930 - 1.8884722x_1 - 1.9342268x_2, & x_1 \in [0, 2), & x_2 \in [-2, 0) & (\text{LCU}_3) \\
 \pi(x_1, x_2) &= -0.29549897 - 1.9022338x_1 - 1.9436346x_2, & x_1 \in [0, 2), & x_2 \in [0, 2) & (\text{LCU}_4)
 \end{aligned}$$

224 The underlying  $x_1 \times x_2$  plane in Figure 3 is the projection of the four LCUs. Under the control of  
 225 these four LCUs, the agent can reach the goal region (orange box). The two sequences of purple  
 226 boxes represent the range of reachable states from corresponding initial regions to the goal region.

With exacted LCUs from a PLDNN, we can build a verifiable hybrid automaton for the system by substituting equivalently the neural networks using corresponding LCUs. Theorem 2 formulates the hybrid automaton after a decision network  $\pi$  is substituted by LCUs. The differences from Theorem 1 include the definitions of transitions  $T$ , guard condition  $G$  and reset formula  $R$ . For the pldnn controlled systems, We use  $|S_\phi|$  transitions each of which contains a guard condition and a reset formula to update the action  $a$  to  $\pi_c(s) \cdot [1, s]$  at each  $\delta$ . Notice that,  $\pi_c(s)$  is a determined vector since  $\forall s \in \phi^{-1}(s_\phi^i)$ , the outputs of  $\pi_c$  are the same according to the dedicated structure of  $\pi_c$ . Thus, the reset formula for  $a$  is simplified to an affine mapping.

**Theorem 2.** *Given a DRL system with environment dynamics  $f$ , PLDNN  $\pi$ , time step size  $\delta$  and initial state set  $S_0$ , it can be equivalently modeled as a hybrid automaton as follows:*

- *Var:* state variable  $s$ , action  $a$ , clock variable  $t_c$       •  $I_0: \{(l_0, (s \in S_0, a = 0, t_c = \delta))\}$
- $L: \{l_0\}$       • *Inv:*  $Inv(l_0) = \{s \in S, t_c \leq \delta\}$       •  $F: F(l_0) = \{\dot{s} = f(s, a), \dot{a} = 0, \dot{t}_c = 1\}$
- $T: \{(l_0, l_0), \dots, (l_0, l_0)\}$  where  $|T| = |S_\phi|$
- $G: G(T[i]) = \{t_c = \delta, s \in \phi^{-1}(s_\phi^i)\}$  where  $0 \leq i < |T| \wedge s_\phi^i \in S_\phi$
- $R: R(T[i]) = \{t_c = 0, a = \pi_c(s) \cdot [1, s]\}$  where  $0 \leq i < |T| \wedge s \in \phi^{-1}(s_\phi^i)$

Our soundness proofs of both Theorem 1 and Theorem 2 are given in Appendix A.5. Based on Theorem 2, we can build a hybrid automaton for the DRL system in Example 1. Assuming the trained system has four linear control units as shown in Formulas (LCU<sub>1</sub>-LCU<sub>4</sub>) and  $\delta = 0.2$ , we construct the corresponding hybrid automaton as depicted in Figure 4. The four transitions in the automaton correspond to the four LCUs, respectively. The guard of each transition represents the condition of triggering the corresponding policy.

Thanks to the linearity of control policies in  $R$ , a hybrid automaton built for a PLDNN-controlled system can be efficiently verified by state-of-the-art tools. For instance, Flow\* [23] is a representative tool for the reachability analysis of hybrid systems. In this paper we are focused on the verification of both goal-reach and reach-avoid properties. The former means that given a set of initial states, a system must eventually reach the goal region from any initial state. The latter means that the system never enters unsafe regions within a specific time horizon. Both properties can be verified via reachability analysis.

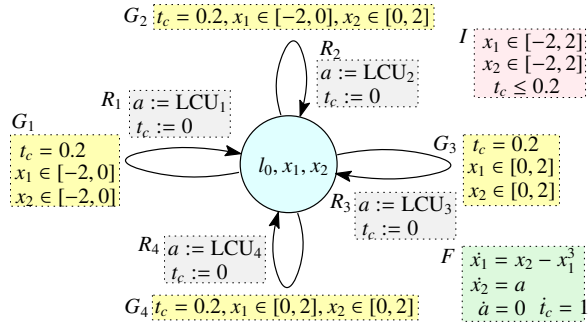

Figure 4: The hybrid automaton of the DRL system with the trained piece-wise linear controllers in Figure 3.

## 5 Experiments

We prototype our approach into a tool called LINCON, with DDPG as the backend DRL algorithm and Flow\* as the verification engine. We extensively assess it, along with the state-of-the-art tools. Our goal is to show, for the PLDNN-based training, (i) the reduction in the number of partitions with comparable cumulative rewards, robustness, and time overhead with respect to conventional DNN-based training; (ii) its high verification performance including the tightness of over-approximation sets and the efficiency of verification; and (iii) its scalability for large-sized neural networks and systems with complex dynamics and high-dimensional state space.

**Experimental Setup.** All experiments were conducted on a workstation equipped with a 32-core AMD Ryzen Threadripper CPU @ 3.6GHz and 256GB RAM, running Ubuntu 22.04.

**Benchmarks.** We choose eight benchmarks, including six regular benchmarks from Verisig 2.0 [9] (B1-B5 and Tora) and two complex benchmarks (CartPole with extreme complex dynamics from OpenAI Gym [40] and quadrotor (QUAD) with 12-dimensional state space and 3-dimensional action space from [10]). For fair comparisons, we use the same training configuration and guarantee that all trained systems reach the specified reward threshold. See Appendix A.1 for the detailed setting.



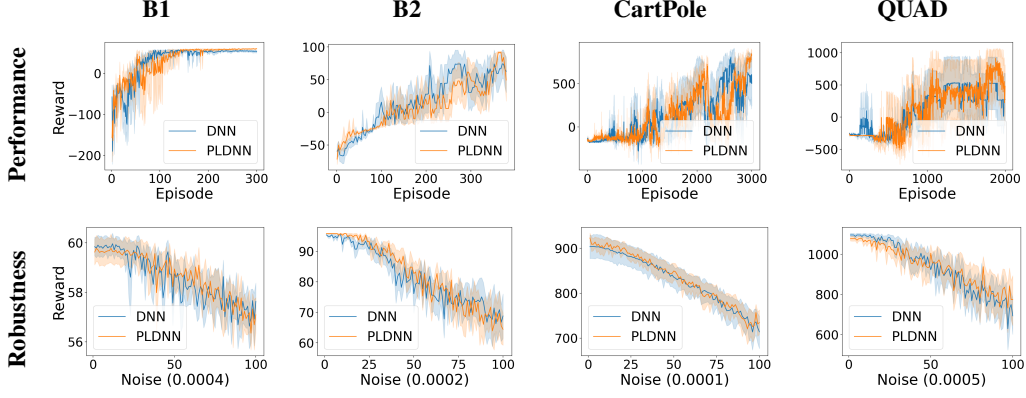

Figure 5: Performance and robustness comparison between PLDNNs and DNNs. The number in the parentheses is the base of  $\sigma$ , e.g., when the abscissa is 50 in B1, we have  $\sigma = 50 \times 0.0004 = 0.02$ .

## 5.1 Performance Evaluation

We assess the performance of PLDNN, together with the conventional DNNs, in terms of cumulative reward, robustness, and training time under the same training configuration. We also measure the number of abstracted states required for training linear control policies and constant policies [21]. Due to space limitations, we present the experimental results only for B1, B2, and two complex cases (i.e., CartPole and QUAD). The associated conclusions (from Table 1 and Figure 5) also apply to the other four cases; see Appendix A.2 for the detailed experimental results.

**Cumulative Reward.** Figure 5 plots the system cumulative reward (the average of five trials) during the training process. The solid lines and shadows refer to the average reward and 95% confidence interval, respectively. Apparently, the trends of accumulative rewards by PLDNNs and DNNs are comparable. Despite slightly more time required for training with PLDNN due to its additional conversion from actual state to abstract state (see Table 1, “Training Time”), we can, however, obtain a significant advance in the efficiency and tightness of verification (see Section 5.2).

**Robustness.** We also evaluate the robustness of PLDNNs as training the linear controller on each partition may lead to discontinuity of control decisions in the boundaries of partitions. For a current state  $s = (x_1, \dots, x_n)$ , we add a Gaussian noise  $X_1, \dots, X_n$  to  $s$  and obtain a perturbed state  $s' = (x_1 + X_1, \dots, x_n + X_n)$  for calculating the control action, where  $X_i \sim \mathbf{N}(\mu_i, \sigma_i^2)$  with  $1 \leq i \leq n$  and  $\mu_i = 0$ . For each benchmark, we train 10 different policies and evaluate their robustness under 100 different perturbation levels to obtain the average and 95% confidence interval of the cumulative reward. Figure 5 depicts the reward trend with the increasing perturbation level. As  $\sigma$  increases, the decline ratio of the system with PLDNNs is comparable to that with DNNs, which implies that both achieve similar robustness.

**Reduction in the Number of Partitions.** We measure the effect of reducing the number of partitions by utilizing a linear policy, instead of the constant action on each partition. In both cases, we start training from a coarse-grained abstraction granularity (with only one partition) and gradually refine the abstraction granularity until the preset reward threshold is satisfied. As shown in Table 1, linear policies significantly reduce the number of partitions required for reaching the reward threshold, which benefits the verification efficiency as we will see next.

## 5.2 Verification Efficiency

We evaluate the verification efficiency and tightness for the PLDNN-based and DNN-based DRL systems, respectively. Regarding tightness, we choose two state-of-the-art tools, i.e., Polar [10] and Verisig 2.0 [9], for the reachability analysis of DNN-controlled systems. We do not consider ReachNN\* which both Polar and Verisig 2.0 have been demonstrated to outperform [9, 10]. For efficiency, we employ Flow\* to perform reachability analysis, which is used by both Polar and Verisig 2.0 as the backend reachability analysis tool.

Table 2: Verification results and time in seconds.

| Task     | Dim | Network               | LinCon |      | Polar  |       |                | Verisig 2.0 |        |          |       |                |
|----------|-----|-----------------------|--------|------|--------|-------|----------------|-------------|--------|----------|-------|----------------|
|          |     |                       | 1 Core | V.R. | 1 Core | Impr. | V.R.           | 1 Core      | Impr.  | 20 Cores | Impr. | V.R.           |
| B1       | 2   | Tanh <sub>2×20</sub>  | 2.31   | ✓    | 17     | 7.4×  | ✓              | 45          | 19.5×  | 38       | 16.5× | ✓              |
|          |     | Tanh <sub>3×100</sub> | 2.28   | ✓    | 125    | 54.8× | ✓              | 413         | 181.1× | 123      | 53.9× | ✓              |
|          |     | ReLU <sub>2×20</sub>  | 2.11   | ✓    | 3      | 1.4×  | ✓              | —           | —      | —        | —     | ✗ <sup>c</sup> |
|          |     | ReLU <sub>3×100</sub> | 2.59   | ✓    | —      | —     | ✗ <sup>b</sup> | —           | —      | —        | —     | —              |
| B2       | 2   | Tanh <sub>2×20</sub>  | 0.57   | ✓    | 5      | 8.8×  | ✓              | 5           | 8.8×   | 4        | 7.0×  | ✗ <sup>a</sup> |
|          |     | Tanh <sub>3×100</sub> | 0.56   | ✓    | —      | —     | ✗ <sup>b</sup> | —           | —      | —        | —     | ✗ <sup>b</sup> |
|          |     | ReLU <sub>2×20</sub>  | 0.64   | ✓    | 3      | 4.7×  | ✓              | —           | —      | —        | —     | ✗ <sup>c</sup> |
|          |     | ReLU <sub>3×100</sub> | 0.60   | ✓    | —      | —     | ✗ <sup>b</sup> | —           | —      | —        | —     | —              |
| B3       | 2   | Tanh <sub>2×20</sub>  | 2.69   | ✓    | 18     | 6.7×  | ✓              | 36          | 13.4×  | 28       | 10.4× | ✓              |
|          |     | Tanh <sub>3×100</sub> | 3.57   | ✓    | 91     | 25.5× | ✓              | 357         | 100.0× | 88       | 24.6× | ✓              |
|          |     | ReLU <sub>2×20</sub>  | 3.05   | ✓    | 8      | 2.6×  | ✓              | —           | —      | —        | —     | ✗ <sup>c</sup> |
|          |     | ReLU <sub>3×100</sub> | 2.92   | ✓    | 14     | 4.8×  | ✓              | —           | —      | —        | —     | —              |
| B4       | 3   | Tanh <sub>2×20</sub>  | 1.44   | ✓    | 5      | 3.5×  | ✓              | 7           | 4.9×   | 5        | 3.5×  | ✓              |
|          |     | Tanh <sub>3×100</sub> | 1.45   | ✓    | 27     | 18.6× | ✓              | 114         | 78.6×  | 31       | 21.4× | ✓              |
|          |     | ReLU <sub>2×20</sub>  | 1.43   | ✓    | 2      | 1.4×  | ✓              | —           | —      | —        | —     | ✗ <sup>c</sup> |
|          |     | ReLU <sub>3×100</sub> | 1.43   | ✓    | 5      | 3.5×  | ✓              | —           | —      | —        | —     | —              |
| B5       | 3   | Tanh <sub>3×100</sub> | 3.24   | ✓    | 38     | 11.7× | ✓              | 157         | 48.5×  | 44       | 13.4× | ✓              |
|          |     | Tanh <sub>4×200</sub> | 3.29   | ✓    | 157    | 47.7× | ✓              | 1443        | 438.6× | 191      | 58.1× | ✓              |
|          |     | ReLU <sub>3×100</sub> | 3.28   | ✓    | 7      | 2.1×  | ✓              | —           | —      | —        | —     | ✗ <sup>c</sup> |
|          |     | ReLU <sub>4×200</sub> | 3.29   | ✓    | 49     | 14.9× | ✓              | —           | —      | —        | —     | —              |
| Tora     | 4   | Tanh <sub>3×20</sub>  | 1.57   | ✓    | 45     | 28.7× | ✓              | 69          | 43.9×  | 46       | 29.3× | ✓              |
|          |     | Tanh <sub>4×100</sub> | 1.75   | ✓    | —      | —     | ✗ <sup>b</sup> | —           | —      | —        | —     | ✗ <sup>b</sup> |
|          |     | ReLU <sub>3×20</sub>  | 1.58   | ✓    | 30     | 19.0× | ✓              | —           | —      | —        | —     | ✗ <sup>c</sup> |
|          |     | ReLU <sub>4×100</sub> | 1.62   | ✓    | 53     | 32.7× | ✓              | —           | —      | —        | —     | —              |
| CartPole | 4   | Tanh <sub>3×64</sub>  | 151    | ✓    | —      | —     | ✗ <sup>b</sup> | —           | —      | —        | —     | ✗ <sup>b</sup> |
| QUAD     | 12  | Tanh <sub>3×64</sub>  | 1054   | ✓    | —      | —     | ✗ <sup>b</sup> | —           | —      | —        | —     | ✗ <sup>b</sup> |

**Remarks.** **Impr.:** time speedup of LinCon compared to Verisig or Polar (Verisig or Polar/LinCon). **Tanh/ReLU<sub>n×k</sub>:** a DNN with the activation function Tanh/ReLU,  $n$  hidden layers, and  $k$  neurons per hidden layer. **VR:** verification result. ✓: the reachability problem is successfully verified. ✗<sup>type</sup>: the reachability problem cannot be verified due to *type*: (a) large over-approximation error, (b) the calculation did not finish, (c) not applicable. —: no data available due to ✗<sup>b</sup> or ✗<sup>c</sup>.

**Efficiency.** Table 2 presents the comparison results for the verification efficiency. For each regular case, we choose four different network configurations: two smaller networks (e.g., Tanh<sub>2×20</sub>) from [10] and two larger networks (e.g., Tanh<sub>3×100</sub>). Our approach LinCon can handle all 26 instances including the two complex instances, while Polar succeeds only in 20 cases. Verisig 2.0 is not applicable to ReLU networks (marked by ✗<sup>c</sup>) and succeeds only in 9 instances. Overall, LinCon outperforms both Polar (up to 47.7× speedup) and Verisig 2.0 (up to 438.6× speedup). In particular, LinCon achieves even up to 58.1× speedup compared to Verisig 2.0 accelerated by 20-core parallelization. For our approach LinCon, the only time overhead for encoding networks stems from extracting LCUs from PLDNNs, which is negligible (less than 0.05s). Consequently, LinCon can scale up to large-sized neural networks.

**Tightness.** We compare the tightness of the over-approximation sets computed by different approaches. Figure 6 plots the experimental results, along with the corresponding simulation trajectories. For B2 and Tora, LinCon has a significant tightness improvement over Polar: the range of the over-approximation sets (red boxes) calculated by Polar far outreaches the range of the reachable states obtained from the simulation. Verisig 2.0 shares similar tightness results with Polar; see Appendix A.3. We also defer to Appendix A.3 the experimental results for the remaining four cases where all three tools obtain similar tightness results.

**Discussion on CartPole and QUAD.** We discuss the verification results of the two complex cases, namely CartPole and QUAD. Both Polar and Verisig 2.0 fail to verify them. As shown in Figure 6, Polar aborts after 20 steps due to the huge over-approximation error in CartPole. In contrast, such a complex policy trained with our approach can be efficiently and tightly verified. In particular, the trajectories diverge first and finally merge. The computed reachable states tightly over-approximate these trajectories, and the computation takes only 151 seconds. Regarding the 12-dimensional QUAD case, Polar times out (two hours) after only two steps, while LinCon produces a very tight set of reachable states in 1054 seconds even after 15 steps, which is 7 times deeper than Polar. To the best of our knowledge, this is the first time that QUAD can be formally verified more than ten steps under various decision networks. Note that the trained policies used in the comparison differ due to different decision networks, and thus agents may follow different paths to the goal region (see the



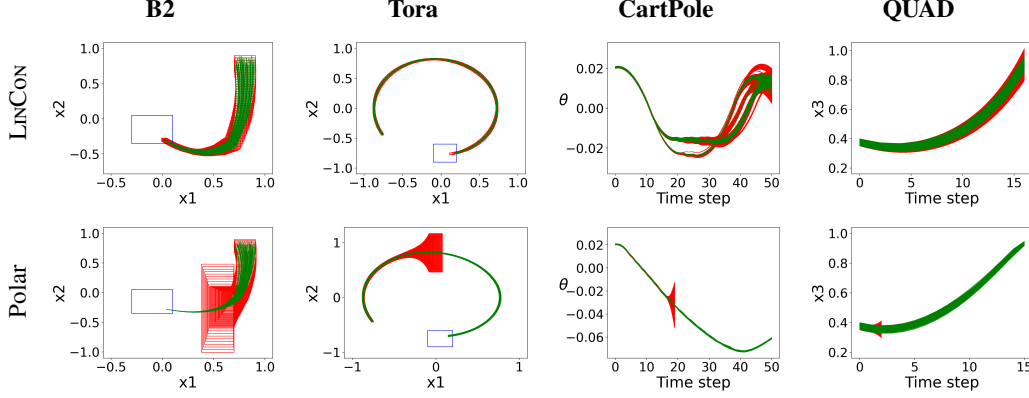

Figure 6: Tightness comparison with respect to the DRL systems with larger decision networks (red box: over-approximation sets; green lines: simulation trajectories; blue box: goal region).

simulated trajectories in Figure 6). Hence, for a fair comparison, we conduct more evaluations, from which we can draw the same conclusion as from Figure 6. The results are given in Appendix A.3.

## 6 Related Work

**Policy Synthesis.** Several works adopt programmatic policies (e.g., decision trees and program controllers) which are more interpretable and amenable to formal verification than neural policies. Bastani et al. [15] construct a decision tree to represent a DNN policy based on imitation learning [41]. Verma et al. [42, 43] follow a similar routine, distilling neural network policies into predefined program templates. Trivedi et al. [44] use a two-stage learning scheme to synthesize programmatic policies. Some efforts are dedicated to exploring the combination of training and verification. Zhu et al. [29] propose an inductive framework for synthesizing a deterministic policy program from neural policies. Wang et al. [30] learn programmatic controllers based on verification feedback to avoid safety violations. Our proposed PLDNN is essentially a DNN-based implementation of programmatic controllers, which could be integrated with these verification-guided synthesis approaches.

**Reachability Analysis.** Our work is also built atop the approaches for reachability analysis of neural-network-controlled systems. NNV [45] utilizes star set [46] to perform range analysis of decision networks. JuliaReach [47] uses zonotope propagation to cover the output of a decision network. Verisig [48, 9] models a decision network with differentiable activation functions (e.g., Tanh) as a hybrid system and analyzes its reachability for over-approximating the network. ReachNN\* [27, 8] abstracts the input-output mapping of a decision network with a Bernstein polynomial, together with an error bound on the approximation. Sherlock [7] focuses on ReLU-based networks and computes tight Taylor models via rule generation. Polar [10] integrates the Taylor and Bernstein approximation techniques for building a Taylor model which over-approximates decision networks. All these efforts over-approximate the embedded DNNs, which limit their scalability and verification accuracy.

## 7 Conclusion and Future Work

We have presented PLDNN that seamlessly integrates DNN and programmatic controls via state abstraction for boosting the formal verification of DRL systems. Unlike traditional train-then-transform approaches, PLDNN accompanies a novel inverse training and verification method, in which a DNN is first transformed into an equivalent set of linear control policies and then trained to optimize them. Experimental results have shown that PLDNN-controlled systems can be more efficiently and tightly verified than DNN-based systems, with up to 438 times speedup and 7 times deeper computation steps for a 12-dimensional control task.

Our work sheds light on a promising direction towards developing dependable DRL systems: learning easy-to-verify and high-performance control policies via DRL and abstraction techniques. Given the encouraging results of linear control policies, our work would also stimulate a passion for substituting them with, e.g., polynomial control policies, for training and verifying more complex DRL systems.

## References

- [1] Z. Zhang and K. P. Lam, “Practical implementation and evaluation of deep reinforcement learning control for a radiant heating system,” in *Proceedings of the 5th Conference on Systems for Built Environments*, 2018, pp. 148–157.
- [2] Y. Pan, C.-A. Cheng, K. Saigol, K. Lee, X. Yan, E. Theodorou, and B. Boots, “Agile autonomous driving using end-to-end deep imitation learning,” in *Robotics: science and systems*, 2018.
- [3] X. Qi, Y. Luo, G. Wu, K. Boriboonsomsin, and M. Barth, “Deep reinforcement learning enabled self-learning control for energy efficient driving,” *Transportation Research Part C: Emerging Technologies*, vol. 99, pp. 67–81, 2019.
- [4] B. R. Kiran, I. Sobh, V. Talpaert, P. Mannion, A. A. Al Sallab, S. Yogamani, and P. Pérez, “Deep reinforcement learning for autonomous driving: A survey,” *IEEE Transactions on Intelligent Transportation Systems*, vol. 23, no. 6, pp. 4909–4926, 2021.
- [5] F.-L. Fan, J. Xiong, M. Li, and G. Wang, “On interpretability of artificial neural networks: A survey,” *IEEE Transactions on Radiation and Plasma Medical Sciences*, vol. 5, no. 6, pp. 741–760, 2021.
- [6] R. V. Yampolskiy, “Unexplainability and incomprehensibility of AI,” *Journal of Artificial Intelligence and Consciousness*, vol. 7, no. 02, pp. 277–291, 2020.
- [7] S. Dutta, X. Chen, and S. Sankaranarayanan, “Reachability analysis for neural feedback systems using regressive polynomial rule inference,” in *ACM International Conference on Hybrid Systems: Computation and Control (HSCC’19)*, 2019, pp. 157–168.
- [8] J. Fan, C. Huang, X. Chen, W. Li, and Q. Zhu, “Reachnn\*: A tool for reachability analysis of neural-network controlled systems,” in *International Symposium on Automated Technology for Verification and Analysis*. Springer, 2020, pp. 537–542.
- [9] R. Ivanov, T. Carpenter, J. Weimer, R. Alur, G. Pappas, and I. Lee, “Verisig 2.0: Verification of neural network controllers using taylor model preconditioning,” in *International Conference on Computer Aided Verification (CAV’21)*. Springer, 2021, pp. 249–262.
- [10] C. Huang, J. Fan, X. Chen, W. Li, and Q. Zhu, “Polar: A polynomial arithmetic framework for verifying neural-network controlled systems,” in *The 20th International Symposium on Automated Technology for Verification and Analysis (ATVA’22)*. Springer, 2022, pp. 414–430.
- [11] K. Makino and M. Berz, “Taylor models and other validated functional inclusion methods,” *International Journal of Pure and Applied Mathematics*, vol. 6, pp. 239–316, 2003.
- [12] W. Ruan, X. Huang, and M. Kwiatkowska, “Reachability analysis of deep neural networks with provable guarantees,” in *Proceedings of the 27th International Joint Conference on Artificial Intelligence*, 2018, pp. 2651–2659.
- [13] S. Dutta, S. Jha, S. Sankaranarayanan, and A. Tiwari, “Output range analysis for deep feedforward neural networks,” in *10th International Symposium on NASA Formal Methods (NFM’18)*. Springer, 2018, pp. 121–138.
- [14] L. M. Schmidt, G. Kontes, A. Plinge, and C. Mutschler, “Can you trust your autonomous car? interpretable and verifiably safe reinforcement learning,” in *2021 IEEE Intelligent Vehicles Symposium (IV)*. IEEE, 2021, pp. 171–178.
- [15] O. Bastani, Y. Pu, and A. Solar-Lezama, “Verifiable reinforcement learning via policy extraction,” *Advances in Neural Information Processing Systems (NeurIPS’18)*, vol. 31, 2018.
- [16] C. Bucilua, R. Caruana, and A. Niculescu-Mizil, “Model compression,” in *Proceedings of the 12th ACM SIGKDD international conference on Knowledge discovery and data mining (KDD’06)*, 2006, pp. 535–541.
- [17] G. Hinton, O. Vinyals, and J. Dean, “Distilling the knowledge in a neural network,” *arXiv preprint arXiv:1503.02531*, 2015.
- [18] T. Brázdil, K. Chatterjee, M. Chmelik, V. Forejt, J. Křetínský, M. Kwiatkowska, D. Parker, and M. Ujma, “Verification of markov decision processes using learning algorithms,” in *12th International Symposium on Automated Technology for Verification and Analysis (ATVA’14)*. Springer, 2014, pp. 98–114.
- [19] D. Abel, D. E. Hershkowitz, and M. L. Littman, “Near optimal behavior via approximate state abstraction,” in *International Conference on Machine Learning (ICML’16)*, vol. 48, 2016, pp. 2915–2923.

- [20] D. Abel, “A theory of state abstraction for reinforcement learning,” in *AAAI Conference on Artificial Intelligence (AAAI’19)*, vol. 33, no. 01, 2019, pp. 9876–9877.
- [21] P. Jin, J. Tian, D. Zhi, X. Wen, and M. Zhang, “Trainify: A CEGAR-driven training and verification framework for safe deep reinforcement learning,” in *International Conference on Computer Aided Verification (CAV’22)*. Springer, 2022, pp. 193–218.
- [22] R. Alur, C. Courcoubetis, N. Halbwachs, T. A. Henzinger, P.-H. Ho, X. Nicollin, A. Olivero, J. Sifakis, and S. Yovine, “The algorithmic analysis of hybrid systems,” *Theoretical computer science*, vol. 138, no. 1, pp. 3–34, 1995.
- [23] X. Chen, E. Ábrahám, and S. Sankaranarayanan, “Flow\*: An analyzer for non-linear hybrid systems,” in *25th International Conference on Computer Aided Verification (CAV’13)*. Springer, 2013, pp. 258–263.
- [24] P. Collins, D. Bresolin, L. Geretti, and T. Villa, “Computing the evolution of hybrid systems using rigorous function calculus,” *IFAC Proceedings Volumes*, vol. 45, no. 9, pp. 284–290, 2012.
- [25] M. Althoff, “An introduction to cora 2015,” *ARCH@ CPSWeek*, vol. 34, pp. 120–151, 2015.
- [26] X. Chen, “Reachability analysis of non-linear hybrid systems using taylor models,” Ph.D. dissertation, Fachgruppe Informatik, RWTH Aachen University, 2015.
- [27] C. Huang, J. Fan, W. Li, X. Chen, and Q. Zhu, “Reachnn: Reachability analysis of neural-network controlled systems,” *ACM Transactions on Embedded Computing Systems*, vol. 18, no. 5s, pp. 1–22, 2019.
- [28] M. Grześ and D. Kudenko, “Multigrid reinforcement learning with reward shaping,” in *18th International Conference Artificial Neural Networks (ICANN’08)*. Springer, 2008, pp. 357–366.
- [29] H. Zhu, Z. Xiong, S. Magill, and S. Jagannathan, “An inductive synthesis framework for verifiable reinforcement learning,” in *Proceedings of the 40th ACM SIGPLAN conference on Programming Language Design and Implementation (PLDI’19)*, 2019, pp. 686–701.
- [30] Y. Wang and H. Zhu, “Verification-guided programmatic controller synthesis,” in *29th International Conference on Tools and Algorithms for the Construction and Analysis of Systems (TACAS’23)*. Springer, 2023, pp. 229–250.
- [31] P. Cousot and R. Cousot, “Abstract interpretation: a unified lattice model for static analysis of programs by construction or approximation of fixpoints,” in *Proceedings of the 4th ACM SIGACT-SIGPLAN symposium on Principles of programming languages (POPL’77)*, 1977, pp. 238–252.
- [32] M. Afzal, A. Asia, A. Chauhan, B. Chimdyalwar, P. Darke, A. Datar, S. Kumar, and R. Venkatesh, “Veriabs: Verification by abstraction and test generation,” in *The 34th IEEE/ACM International Conference on Automated Software Engineering (ASE’19)*. IEEE, 2019, pp. 1138–1141.
- [33] K. Heo, H. Oh, and H. Yang, “Resource-aware program analysis via online abstraction coarsening,” in *2019 IEEE/ACM 41st International Conference on Software Engineering (ICSE’19)*. IEEE, 2019, pp. 94–104.
- [34] Z. Wang, A. Albarghouthi, G. Prakriya, and S. Jha, “Interval universal approximation for neural networks,” *Proceedings of the ACM on Programming Languages (POPL)*, vol. 6, no. POPL, pp. 1–29, 2022.
- [35] E. Gallestey and P. Hokayem, “Lecture notes in nonlinear systems and control,” 2019.
- [36] T. P. Lillicrap, J. J. Hunt, A. Pritzel *et al.*, “Continuous control with deep reinforcement learning,” in *International Conference on Learning Representations (ICLR’16)*. OpenReview.net, 2016.
- [37] S. Fujimoto, H. Hoof, and D. Meger, “Addressing function approximation error in actor-critic methods,” in *International Conference on Machine Learning (ICML’18)*. PMLR, 2018, pp. 1587–1596.
- [38] D. E. Rumelhart, R. Durbin, R. Golden, and Y. Chauvin, “Backpropagation: The basic theory,” *Backpropagation: Theory, architectures and applications*, pp. 1–34, 1995.
- [39] S.-i. Amari, “Backpropagation and stochastic gradient descent method,” *Neurocomputing*, vol. 5, no. 4-5, pp. 185–196, 1993.
- [40] G. Brockman, V. Cheung, L. Pettersson, J. Schneider, J. Schulman, J. Tang, and W. Zaremba, “OpenAI Gym,” 2016, arXiv:1606.01540.
- [41] P. Abbeel and A. Y. Ng, “Apprenticeship learning via inverse reinforcement learning,” in *Proceedings of the twenty-first International Conference on Machine Learning (ICML’04)*, 2004, p. 1.

- 479 [42] A. Verma, V. Murali, R. Singh, P. Kohli, and S. Chaudhuri, “Programmatically interpretable reinforcement  
480 learning,” in *International Conference on Machine Learning*. PMLR, 2018, pp. 5045–5054.
- 481 [43] A. Verma, H. Le, Y. Yue, and S. Chaudhuri, “Imitation-projected programmatic reinforcement learning,”  
482 *Advances in Neural Information Processing Systems*, vol. 32, 2019.
- 483 [44] D. Trivedi, J. Zhang, S.-H. Sun, and J. J. Lim, “Learning to synthesize programs as interpretable and  
484 generalizable policies,” *Advances in Neural Information Processing Systems (NeurIPS’21)*, vol. 34, pp.  
485 25 146–25 163, 2021.
- 486 [45] H.-D. Tran, X. Yang, D. Manzananas Lopez, P. Musau, L. V. Nguyen *et al.*, “NNV: the neural network  
487 verification tool for deep neural networks and learning-enabled cyber-physical systems,” in *International  
488 Conference on Computer Aided Verification (CAV’20)*. Springer, 2020, pp. 3–17.
- 489 [46] H.-D. Tran, S. Bak, W. Xiang, and T. T. Johnson, “Verification of deep convolutional neural networks using  
490 imagestars,” in *International Conference on Computer Aided Verification (CAV’20)*. Springer, 2020, pp.  
491 18–42.
- 492 [47] C. Schilling, M. Forets, and S. Guadalupe, “Verification of neural-network control systems by integrating  
493 taylor models and zonotopes,” in *AAAI Conference on Artificial Intelligence (AAAI’22)*, 2022, pp. 8169–  
494 8177.
- 495 [48] R. Ivanov, T. J. Carpenter, J. Weimer, R. Alur, G. J. Pappas, and I. Lee, “Verifying the safety of autonomous  
496 systems with neural network controllers,” *ACM Transactions on Embedded Computing Systems*, vol. 20,  
497 no. 1, pp. 1–26, 2020.

## A Appendix

### A.1 Benchmarks Setting

We present the goal region and unsafe region of each benchmark in Table 3. For B1-B5 and Tora the environment dynamics are the same with [9]. The dynamics of QUAD are the same with [10]. In CartPole, we use the following ODEs to describe its dynamics in [40]:

$$\begin{aligned}\dot{x}_1 &= x_2, \quad \dot{x}_3 = x_4 \\ \dot{x}_2 &= (a + 0.05 * x_4 * x_4 * \sin(x_3)) / 1.1 - (0.05 * ((9.8 * \sin(x_3) - \cos(x_3)) * ((a + 0.05 * x_4 * x_4 * \sin(x_3)) / 1.1)) / \\ &\quad (0.5 * (4.0 / 3.0 - (0.1 * \cos(x_3) * \cos(x_3) / 1.1)))) * \cos(x_3) / 1.1 \\ \dot{x}_4 &= 9.8 * \sin(x_3) - \cos(x_3) * ((a + 0.05 * x_4 * x_4 * \sin(x_3)) / 1.1) / 0.5 * (4.0 / 3.0 - (0.1 * \cos(x_3) * \cos(x_3) / 1.1))\end{aligned}$$

For the 6 regular benchmarks, the target is training a policy to guide the agent to reach the goal region. Therefore, we set a negative reward when the agent is not in the goal region. Once the agent reaches the goal region, it will be awarded a positive reward. In CartPole, the target of training is to prevent the pole from falling over, namely the pole angle  $-0.2 \leq x_3 \leq 0.2$ . We modify the original discrete reward function to a continuous reward function  $-|x_3|$  to try to balance the pole to stay upright. As for QUAD, we aim to control the altitude of the quadrotor above 0.6 ( $x_3 \geq 0.6$ ). Thus we set a continuous reward function  $-|x_3 - 0.8|$  for training a policy that drives the quadrotor to ascend above 0.6.

Table 3: Benchmarks Setting

| Task     | Initial Region                                                            | Goal Region                                       | Unsafe Region                               |
|----------|---------------------------------------------------------------------------|---------------------------------------------------|---------------------------------------------|
| B1       | $x_1 \in [0.8, 0.9]$<br>$x_2 \in [0.5, 0.6]$                              | $x_1 \in [0, 0.2]$<br>$x_2 \in [0.05, 0.3]$       | —                                           |
| B2       | $x_1 \in [0.7, 0.9]$<br>$x_2 \in [0.7, 0.9]$                              | $x_1 \in [-0.3, 0.1]$<br>$x_2 \in [-0.35, 0.5]$   | —                                           |
| B3       | $x_1 \in [0.8, 0.9]$<br>$x_2 \in [0.4, 0.5]$                              | $x_1 \in [0.2, 0.3]$<br>$x_2 \in [-0.3, -0.05]$   | —                                           |
| B4       | $x_1 \in [0.25, 0.27]$<br>$x_2 \in [0.08, 0.1]$<br>$x_3 \in [0.25, 0.27]$ | $x_1 \in [-0.05, 0.05]$<br>$x_2 \in [-0.05, 0]$   | —                                           |
| B5       | $x_1 \in [0.38, 0.4]$<br>$x_2 \in [0.45, 0.47]$<br>$x_3 \in [0.25, 0.27]$ | $x_1 \in [-0.4, -0.28]$<br>$x_2 \in [0.05, 0.22]$ | —                                           |
| Tora     | $x_1 \in [-0.1, 0.2]$<br>$x_2 \in [-0.9, -0.6]$                           | $x_1 \in [-0.25, 0.10]$<br>$x_2 \in [0.2, 0.7]$   | —                                           |
| CartPole | $x_1, x_2, x_4 \in [0.02, 0.02]$<br>$x_3 \in [0.02, 0.021]$               | —                                                 | $x_2 \in [26, 29]$<br>$x_3 \in [-0.2, 0.2]$ |
| QUAD     | $x_1, \dots, x_6 \in [0.35, 0.4]$<br>$x_7, \dots, x_{12} \in [0, 0]$      | $x_3 > 0.6$                                       | —                                           |

### A.2 Comparison on cumulative reward and robustness

In this section, we provide the comparison results on cumulative reward and robustness of B3-B5 and Tora in Figure 7. The solid lines and shadows refer to the average reward and 95% confidence interval, respectively. For these four cases, it is obvious that there are comparable trends in the cumulative rewards of PLDNNs and DNNs during training and under perturbation. Therefore, we can conclude that using PLDNNs will not affect the training efficiency and the robustness of trained systems.

### A.3 Comparison on the tightness of over-approximation sets

**Tightness results of regular cases.** We present the tightness comparison results of B1 and B3-B5 in Figure 8. For these four regular cases, both Polar and Verisig 2.0 can produce tight over-approximation for decision networks, thus all three methods achieve similar tightness results and successfully verify the goal-reach properties.

**Multiple evaluations on CartPole and QUAD.** Since the trained policies used in the comparison differ due to different decision networks, we conduct more evaluations on these two complex cases.

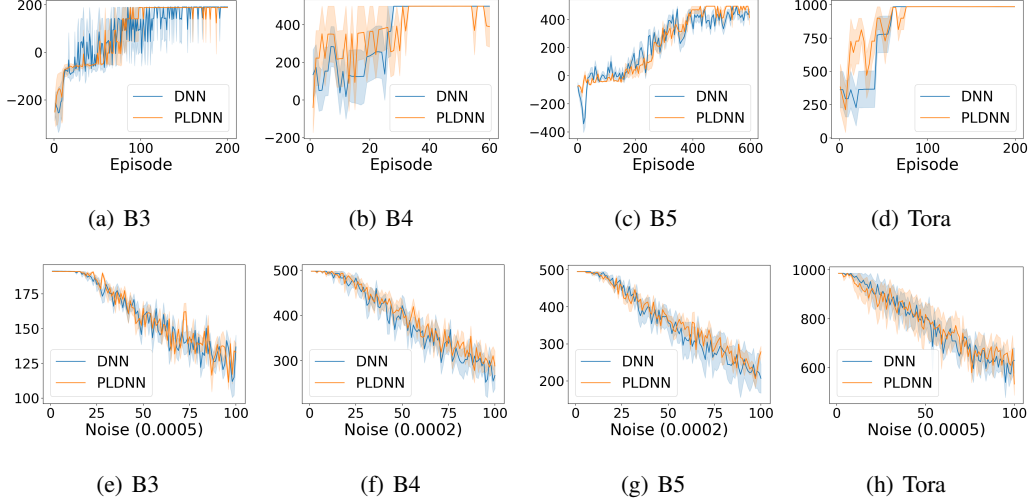

Figure 7: Performance (a-d) and robustness comparison (e-h) of the pldnn and DNN under the same settings. The number in the parentheses is the base of  $\sigma$ . For example, in B3 when the abscissa is equal to 50,  $\sigma = 50 \times 0.0005 = 0.025$ .

523 The corresponding results are shown in Figure 10. For CartPole, Polar did not finish the calculation  
 524 under three different networks as depicted in Figure 10(d-f). Additionally, on the basis of the result  
 525 of dealing with divergent traces as shown in Figure 10(d), we can see that Polar is not suitable  
 526 for dealing with the DNN-controlled systems with divergent traces. As for QUAD, we record the  
 527 computation results within 12 hours and obtain the results as shown in Figure 10(j-l). We can observe  
 528 that only a few time steps are completed by Polar, while LINCON can accomplish more than 10 steps  
 529 within about 1000 seconds under multiple evaluations.

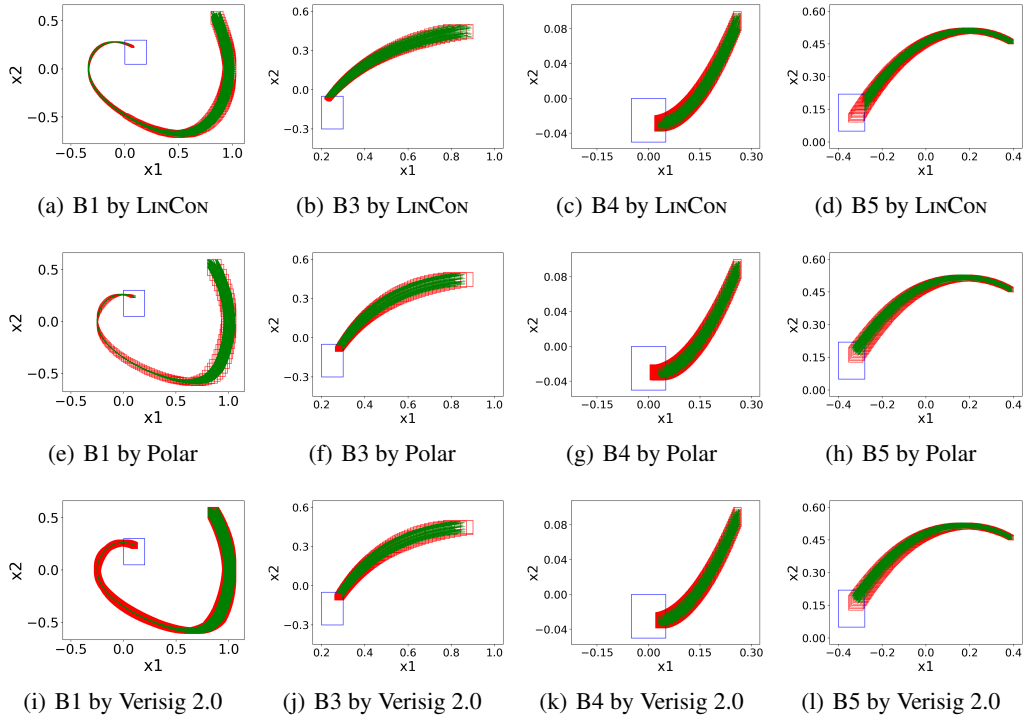

Figure 8: Tightness comparison on the DRL systems with larger decision networks (red box: over-approximation sets; green lines: simulation trajectories; blue box: goal region.)



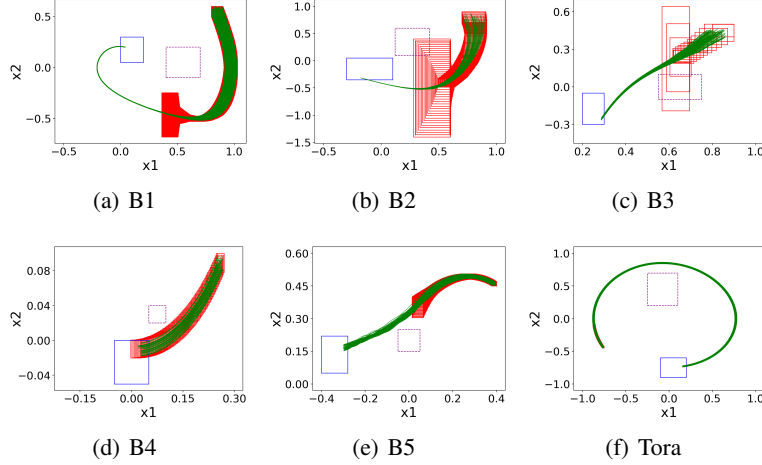

Figure 9: Assessing Verisig 2.0 on the larger networks with big weights. red box: over-approximation set; green lines: simulation trajectories; blue box: goal region; purple dashed box: unsafe region.

#### 530 A.4 Evaluation on Verisig 2.0 with Big Weights

531 Verisig 2.0 produces large over-approximation error when dealing with neural networks with big  
 532 weights. To demonstrate this, we initialize the weights of the neural network with larger values  
 533 (random numbers  $w_l \sim \mathcal{N}(\mu, \sigma^2)$  with  $\mu = 0, \sigma = 0.1$ ) and show the experimental results in Figure 9.  
 534 We observe that the calculated over-approximation sets contain large over-approximation error except  
 535 for B4. In Tora, Verisig 2.0 fails to calculate the complete reachable sets due to too large over-  
 536 approximation error. Hence, it is fairly to say that Verisig 2.0 is sensitive to the DNNs with big  
 537 weights.

#### 538 A.5 Proofs for Theorem 1 and Theorem 2

539 **Definition 1** (Path of Hybrid Automaton [22]). *For a hybrid automaton  $H =$*   
 540  *$\langle L, Var, Inv, F, T, G, R, I_0 \rangle$ , a path of  $H$  is a finite or infinite state sequence starting from*  
 541  *$(l_0, v_0) \in Init: (l_0, v_0) \xrightarrow{f_0} (l_1, v_1) \xrightarrow{f_1} (l_2, v_2) \xrightarrow{f_2} (l_3, v_3) \xrightarrow{f_3} \dots$  such that:*

- 542 1.  $\forall 0 \leq t \leq t_i, \varphi_{f_{l_i}}(v_i, t) \in Inv(l_i)$
- 543 2.  $(l_i, l_{i+1}) \in Trans \wedge \varphi_{f_{l_i}}(v_i, t_i) \in Guard(l_i, l_{i+1}) \wedge v_{i+1} \in R(l_i, l_{i+1})$

544 **Definition 2** (Path of DRL systems). *Given a DRL system  $\mathcal{D}$  with an environment dynamics  $f$ ,*  
 545 *decision network  $\pi$ , time step size  $\delta$  and initial state set  $S_0$ , a path of  $\mathcal{D}$  is a finite or infinite*  
 546 *state-action pair sequence:  $[s_0, a_0] \xrightarrow{f} [s_1, a_1] \xrightarrow{f} [s_2, a_2] \xrightarrow{f} [s_3, a_3] \xrightarrow{f} \dots$  such that:*

- 547 1.  $s_0 \in S_0$
- 548 2.  $[s_{i+1}, a_i] = \varphi_f([s_i, a_i], \delta) \wedge a_i = \pi(s_i)$

549 **Theorem 1** (Equivalence). *A DRL system with an environment dynamics  $f$ , decision network  $\pi$ , time*  
 550 *step size  $\delta$  and initial state set  $S_0$ , can be equivalently modeled as the following hybrid automaton:*

- 551 • *Var:* state variable  $s$ , action  $a$ , clock variable  $t_c$  •  $I_0: \{(l_0, (s \in S_0, a = 0, t_c = \delta))\}$
- 552 •  $L: \{l_0\}$  • *Inv:*  $Inv(l_0) = \{s \in S, t_c \leq \delta\}$  •  $F: F(l_0) = \{\dot{s} = f(s, a), \dot{a} = 0, \dot{t}_c = 1\}$
- 553 •  $T: \{(l_0, l_0)\}$  •  $G: G(l_0, l_0) = \{t_c = \delta\}$  •  $R: R(l_0, l_0) = \{t_c = 0, a = \pi(s)\}$

554 *Proof.* We first analyze the path of the modeled hybrid automaton  $H$ . For an arbitrary initial state  
 555  $(l_0, [s_0, 0, \delta])$ ,  $s_0 \in S_0$ , since  $t_c = \delta$ , the only transition with guard condition  $\{t_c = \delta\}$  will be triggered  
 556 and transition to  $(l_0, [s_0, a_0, 0])$  where  $a_0 = \pi(s_0)$ . Then  $(l_0, [s_0, a_0, 0])$  will move to its time successor

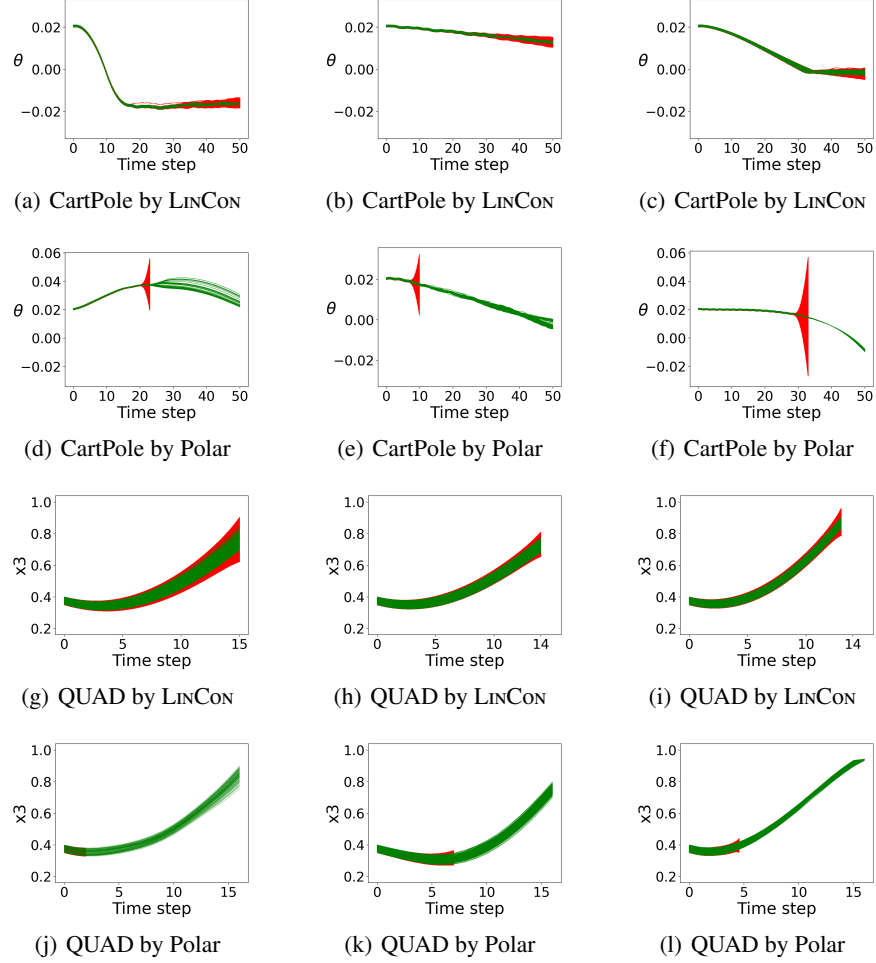

Figure 10: Multiple evaluations on CartPole and QUAD. red box: over-approximation set; green lines: simulation trajectories;

557  $(l_0, [s_1, a_0, \delta])$  where  $[s_1, a_0] = \varphi_f([s_0, a_0], \delta)$ . Next, the transition with guard condition  $\{t_c = \delta\}$   
 558 will be made and conduction the reset operation  $t_c = 0, a = \pi(s_1)$  to obtain the transition successor  
 559  $(l_0, [s_1, a_1, 0])$  in which  $a_1 = \pi(s_1)$ . Repeating the evolution to the time successor and the transition  
 560 successor yields the following sequence:

$$(l_0, [s_0, 0, \delta]) \xrightarrow{f} (l_0, [s_0, a_0, 0]) \xrightarrow{\delta} (l_0, [s_1, a_1, 0]) \xrightarrow{f} (l_0, [s_2, a_2, 0]) \xrightarrow{\delta} \dots$$

561 where  $[s_{i+1}, a_i] = \varphi_f([s_i, a_i], \delta)$  and  $a_i = \pi(s_i)$ . According to Definition 2, given an arbitrary initial  
 562 state  $s_0$ , at each time point  $i\delta$ , due to the same transition relation  $[s_{i+1}, a_i] = \varphi_f([s_i, a_i], \delta) \wedge a_i = \pi(s_i)$   
 563 in  $\mathcal{D}$  and the modeled hybrid automaton  $H$ , starting from same initial state  $s_0$ , the value of state  
 564 variables and action of  $\mathcal{D}$  and  $H$  remain the same at each  $\delta$ . Then with the same state-action pair and  
 565 dynamics  $f$  at each  $\delta$ ,  $\mathcal{D}$  and  $H$  also have the same state-action value during each  $\delta$ .  $\square$

566 **Theorem 2.** Given a DRL system with environment dynamics  $f$ , PLDNN  $\pi$ , time step size  $\delta$  and  
 567 initial state set  $S_0$ , it can be equivalently modeled as a hybrid automaton as follows:

- 568 • *Var*: state variable  $s$ , action  $a$ , clock variable  $t_c$  •  $I_0$ :  $\{(l_0, (s \in S_0, a = 0, t_c = \delta))\}$
- 569 •  $L$ :  $\{l_0\}$  • *Inv*:  $\text{Inv}(l_0) = \{s \in S, t_c \leq \delta\}$  •  $F$ :  $F(l_0) = \{\dot{s} = f(s, a), \dot{a} = 0, \dot{t}_c = 1\}$
- 570 •  $T$ :  $\{(l_0, l_0), \dots, (l_0, l_0)\}$  where  $|T| = |S_\phi|$
- 571 •  $G$ :  $G(T[i]) = \{t_c = \delta, s \in \phi^{-1}(s_\phi^i)\}$  where  $0 \leq i < |T| \wedge s_\phi^i \in S_\phi$

572

- $R: R(T[i]) = \{t_c = 0, a = \pi_c(s) \cdot [1, s]\}$  where  $0 \leq i < |T| \wedge s \in \phi^{-1}(s_\phi^i)$

573

*Proof.* We prove that the path of hybrid automaton  $H_1$  in Theorem 1 is the same as the corresponding hybrid automaton  $H_2$  in Theorem 2 for an arbitrary initial state  $(l_0, [s_0, a_0, \delta])$ . The path of  $H_2$  can be

574  
575

described by the following sequence:

$$(l_0, [s_0, 0, \delta]) \xrightarrow[f]{0} (l_0, [s_0, a_0, 0]) \xrightarrow[f]{\delta} (l_0, [s_1, a_1, 0]) \xrightarrow[f]{\delta} (l_0, [s_2, a_2, 0]) \xrightarrow[f]{\delta} \dots$$

576

where  $[s_{i+1}, a_i] = \varphi_f([s_i, a_i], \delta)$  and  $a_i = \pi_c(s_i) \cdot [1, s_i]$ . With the dedicated structure of PLDNN  $\pi$ , we have  $\pi(s) = \pi_c(s) \cdot [1, s]$ . Thus, at each  $\delta$ , the discrete transitions of  $H_1$  and  $H_2$  change both location continuous variables in the same way. We can conclude that the paths of  $H_1$  and  $H_2$  are exactly the same. Then based on Theorem 1, it is obvious that  $\mathcal{D}$ ,  $H_1$  and  $H_2$  produce the same state-action value for the same initial state.  $\square$

577

578

579

580
